# Supplementary material
Source: HighWire-hosted journal article supplement (https://gpsych.bmj.com/content/33/3/e100117)
Supplement: inline-supplementary-material-1 [file inline-supplementary-material-1.pdf]

**Supplemental Table 1.** GRADE Analyses: ketamine in electroconvulsive therapy for major depressive disorder

| Primary and secondary outcome                                  | Active arms (N) | Risk of bias         | Inconsistency        | Indirectness | Imprecision          | Publication bias | Large effect | Overall quality of evidence <sup>d</sup> |
|----------------------------------------------------------------|-----------------|----------------------|----------------------|--------------|----------------------|------------------|--------------|------------------------------------------|
| <b>Ketamine versus propofol</b>                                |                 |                      |                      |              |                      |                  |              |                                          |
| <b>Depressive symptoms at day 1 after a single ECT session</b> | 83 (3)          | Serious <sup>a</sup> | Serious <sup>b</sup> | No           | Serious <sup>c</sup> | Undetected       | No           | +/-/-/-; Very Low                        |
| <b>Depressive symptoms at day 3 after a single ECT session</b> | 41 (2)          | Serious <sup>a</sup> | No                   | No           | Serious <sup>c</sup> | Undetected       | No           | +/-/-/-; Low                             |
| <b>Depressive symptoms at day 7 after a single ECT session</b> | 41 (2)          | Serious <sup>a</sup> | No                   | No           | Serious <sup>c</sup> | Undetected       | No           | +/-/-/-; Low                             |
| <i>Seizure duration (s)</i>                                    | 86 (3)          | Serious <sup>a</sup> | No                   | No           | Serious <sup>c</sup> | Undetected       | No           | +/-/-/-; Low                             |
| <i>Seizure energy index (uV<sup>2</sup>)</i>                   | 41 (2)          | Serious <sup>a</sup> | No                   | No           | Serious <sup>c</sup> | Undetected       | No           | +/-/-/-; Low                             |
| <i>Open eyes (min)</i>                                         | 68 (2)          | Serious <sup>a</sup> | Serious <sup>b</sup> | No           | Serious <sup>c</sup> | Undetected       | No           | +/-/-/-; Very Low                        |
| <i>Hypertension</i>                                            | 92 (3)          | Serious <sup>a</sup> | No                   | No           | Serious <sup>c</sup> | Undetected       | No           | +/-/-/-; Low                             |
| <i>Nausea and vomiting</i>                                     | 92 (3)          | Serious <sup>a</sup> | No                   | No           | Serious <sup>c</sup> | Undetected       | No           | +/-/-/-; Low                             |
| <b>Ketamine plus propofol versus propofol</b>                  |                 |                      |                      |              |                      |                  |              |                                          |
| <b>Depressive symptoms at day 1 after a single ECT session</b> | 44 (2)          | Serious <sup>a</sup> | No                   | No           | Serious <sup>c</sup> | Undetected       | No           | +/-/-/-; Low                             |
| <b>Depressive symptoms at day 3 after a single ECT session</b> | 44 (2)          | Serious <sup>a</sup> | No                   | No           | Serious <sup>c</sup> | Undetected       | No           | +/-/-/-; Low                             |
| <b>Depressive symptoms at day 7 after a single ECT session</b> | 44 (2)          | Serious <sup>a</sup> | No                   | No           | Serious <sup>c</sup> | Undetected       | No           | +/-/-/-; Low                             |
| <i>Seizure duration (s)</i>                                    | 89 (3)          | Serious <sup>a</sup> | Serious <sup>b</sup> | No           | Serious <sup>c</sup> | Undetected       | No           | +/-/-/-; Very Low                        |
| <i>Seizure energy index (uV<sup>2</sup>)</i>                   | 44 (2)          | Serious <sup>a</sup> | No                   | No           | Serious <sup>c</sup> | Undetected       | No           | +/-/-/-; Low                             |

|                        |        |                      |                      |    |                      |            |    |                   |
|------------------------|--------|----------------------|----------------------|----|----------------------|------------|----|-------------------|
| <i>Open eyes (min)</i> | 67 (2) | Serious <sup>a</sup> | Serious <sup>b</sup> | No | Serious <sup>c</sup> | Undetected | No | +/-/-/-; Very Low |
| <i>Hypertension</i>    | 91 (3) | Serious <sup>a</sup> | No                   | No | Serious <sup>c</sup> | Undetected | No | +/-/-/-; Low      |

<sup>a</sup>All studies reported as having a serious bias used an open-label method, only mentioned random allocation without describing the method and withdrawal from the study.

<sup>b</sup>Meta-analytic results presented a serious inconsistency when  $I^2$  values were greater than 50% or  $P < 0.1$  in the  $Q$  statistics.

<sup>c</sup>For continuous outcomes,  $N < 400$ ; For dichotomous outcomes,  $N < 300$ .

<sup>d</sup>GRADE Working Group grades of evidence: High quality=further research is very unlikely to change our confidence in the estimate of effect. Moderate quality=further research is likely to have an important impact on our confidence in the estimate of effect and may change the estimate. Low quality=further research is very likely to have an important impact on our confidence in the estimate of effect and is likely to change the estimate. Very low quality=we are very uncertain about the estimate.

Abbreviations: GRADE=grading of recommendations assessment, development, and evaluation; ECT=electroconvulsive therapy.

Supplemental Figure 1. Cochrane risk of bias

|                     |                                                           |   |   |   |   |   |   |   |
|---------------------|-----------------------------------------------------------|---|---|---|---|---|---|---|
|                     |                                                           |   |   |   |   |   |   |   |
|                     | <b>Random sequence generation (selection bias)</b>        | ? | - | ? | + | + | + | ? |
|                     | <b>Allocation concealment (selection bias)</b>            | ? | - | ? | + | + | + | ? |
|                     | <b>Blinding of participants and personnel</b>             | ? | - | ? | - | + | + | ? |
|                     | <b>assessment (Symptom reduction, response)</b>           | ? | - | ? | + | + | + | ? |
|                     | <b>Incomplete outcome data addressed (attrition bias)</b> | ? | + | ? | + | + | + | ? |
|                     | <b>Selective reporting (reporting bias)</b>               | ? | + | ? | + | + | + | ? |
|                     | <b>Other sources of bias</b>                              | ? | ? | ? | + | + | + | ? |
| Wang et al., 2012   | ?                                                         | ? | ? | ? | + | + | + | ? |
| Xu et al., 2013     | -                                                         | - | - | - | + | + | + | ? |
| Yalcin et al., 2012 | ?                                                         | + | ? | ? | + | + | + | ? |
| Zhao et al., 2016   | ?                                                         | - | - | - | + | + | + | ? |

+ : Low risk of bias, - : High risk of bias, ? : Unclear risk of bias
